# Supplementary material for: Attenuated Duck Hepatitis A Virus Infection Is Associated With High mRNA Maintenance in Duckling Liver via m6A Modification
Source: PubMed Central journal article supplement (PMC9218207; doi:10.3389/fimmu.2022.839677), 2022-06-09
Supplement: Presentation_1.pdf [file Presentation_1.pdf]

## *Supplementary Material*

### **Attenuated duck hepatitis A virus infection is associated with high mRNA maintenance in duckling liver via m6A modification**

Liping Wu, Weili Quan, Yi Zhang, Mingshu Wang, Xumin Ou, Sai Mao, Di Sun, Qiao Yang, Ying Wu, Yaxun Wei, Renyong Jia<sup>1</sup>, Shun Chen, Dekang Zhu, Mafeng Liu, Xinxin Zhao, Shaqiu Zhang, Juan Huang, Qun Gao, Bin Tian and Anchun Cheng

**Correspondence:** Anchun Cheng (chenganchun@vip.163.com)

**This file includes:**

Supplementary Figure 1-7

Supplementary Table 1-2

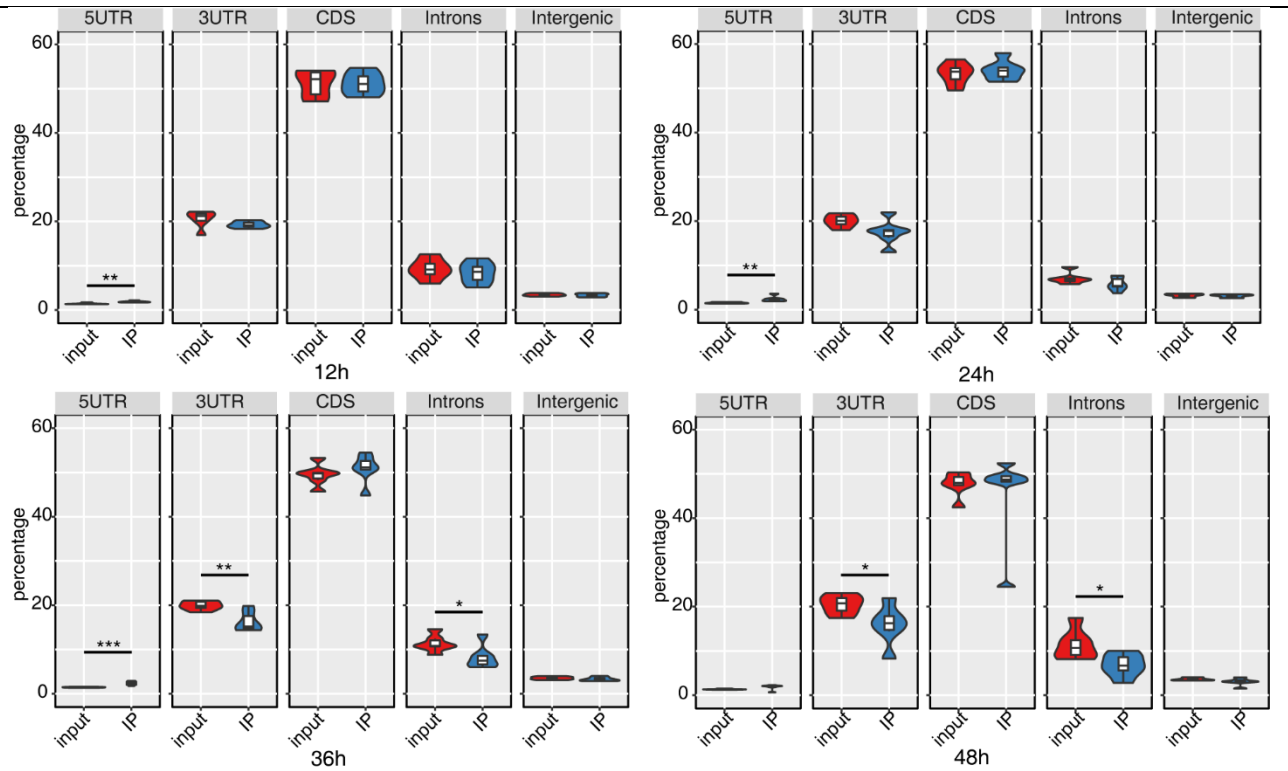

**Supplementary Figure 1.** Common features of m6A peak distributions among different gene regions. Data from RNA-seq (input) and m6A-seq (IP) of both DHAV CH60 strain or CH strain infected duckling livers were used. A similar analysis from different infection time points was presented.

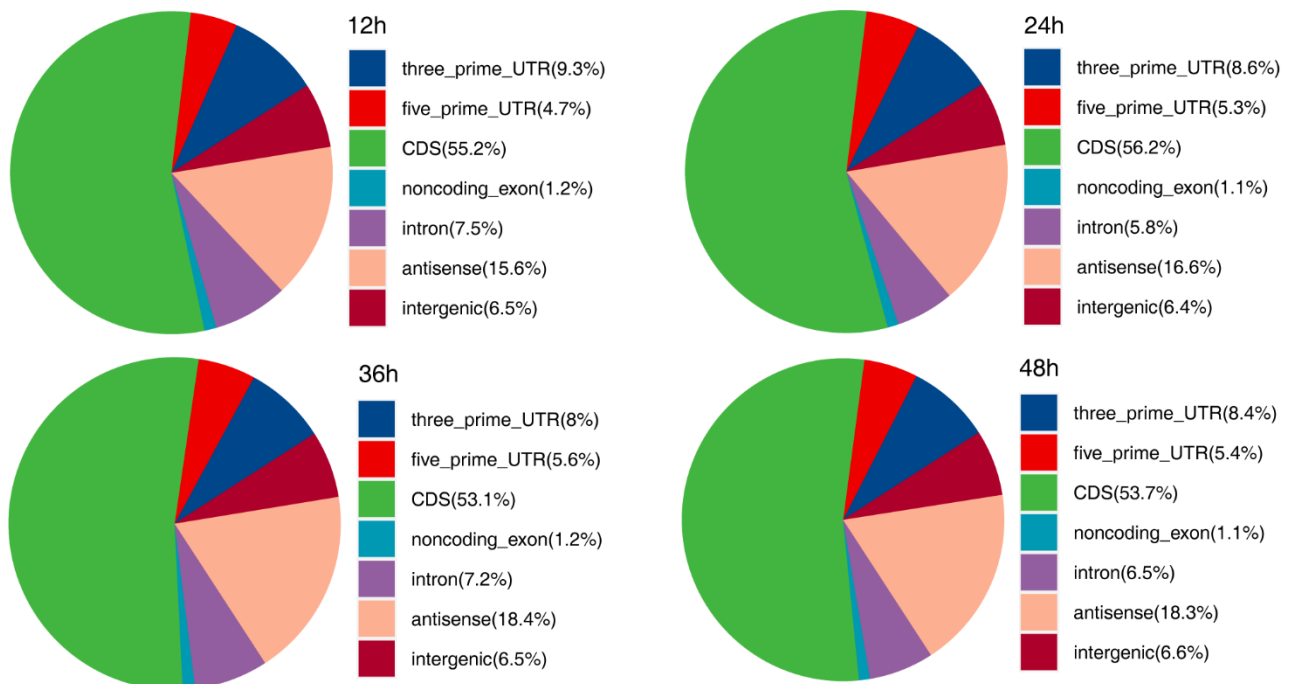

**Supplementary Figure 2.** m6A modified RNA mapping to different genomic regions. A similar analysis from different infection time points was presented. Besides the CDS region, m6A modification in the antisense region represent a large portion, a percentage from 15.6% to 18.4%. Data from RNA-seq (input) and m6A-seq (IP) of both DHAV CH60 strain or CH strain infected duckling livers were used.

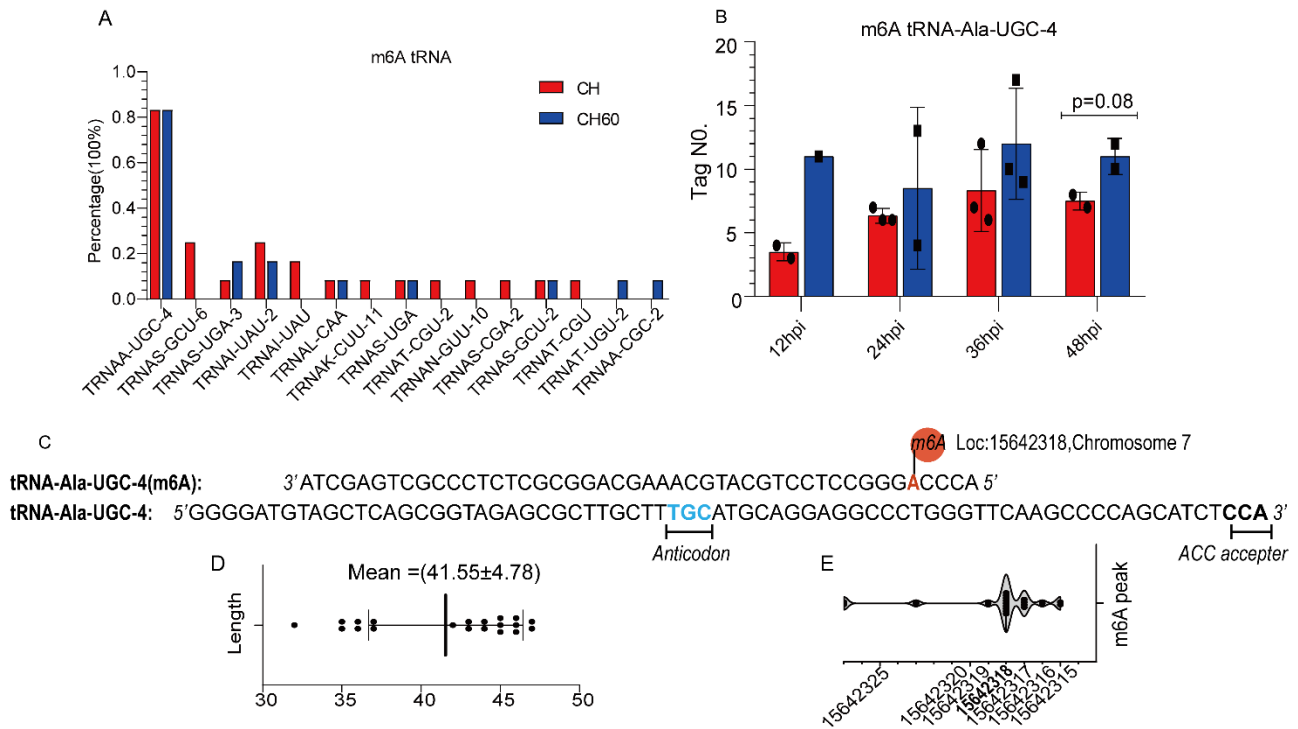

**Supplementary Figure 3.** M6A modification on tRNA-derived fragments. **(A)** tRNA-Ala-UGC-4 antisense strand-derived fragments were highly enriched during the infection. **(B)** The attenuated CH60 strain-induced higher expression of tRNA-Ala-UGC-4 antisense fragments than that of the virulent CH strain during infection. **(C)** binding of tRNA-Ala-UGC-4 antisense fragments to the tRNA-Ala-UGC-4. The m6A modification site and locations were indicated. **(D)** statistic length of tRNA-Ala-UGC-4 antisense fragments ( $41.55 \pm 4.78$ ). **(E)** statistic m6A modification site at tRNA-Ala-UGC-4 antisense fragments (loc: 15642318, chromosome 7).

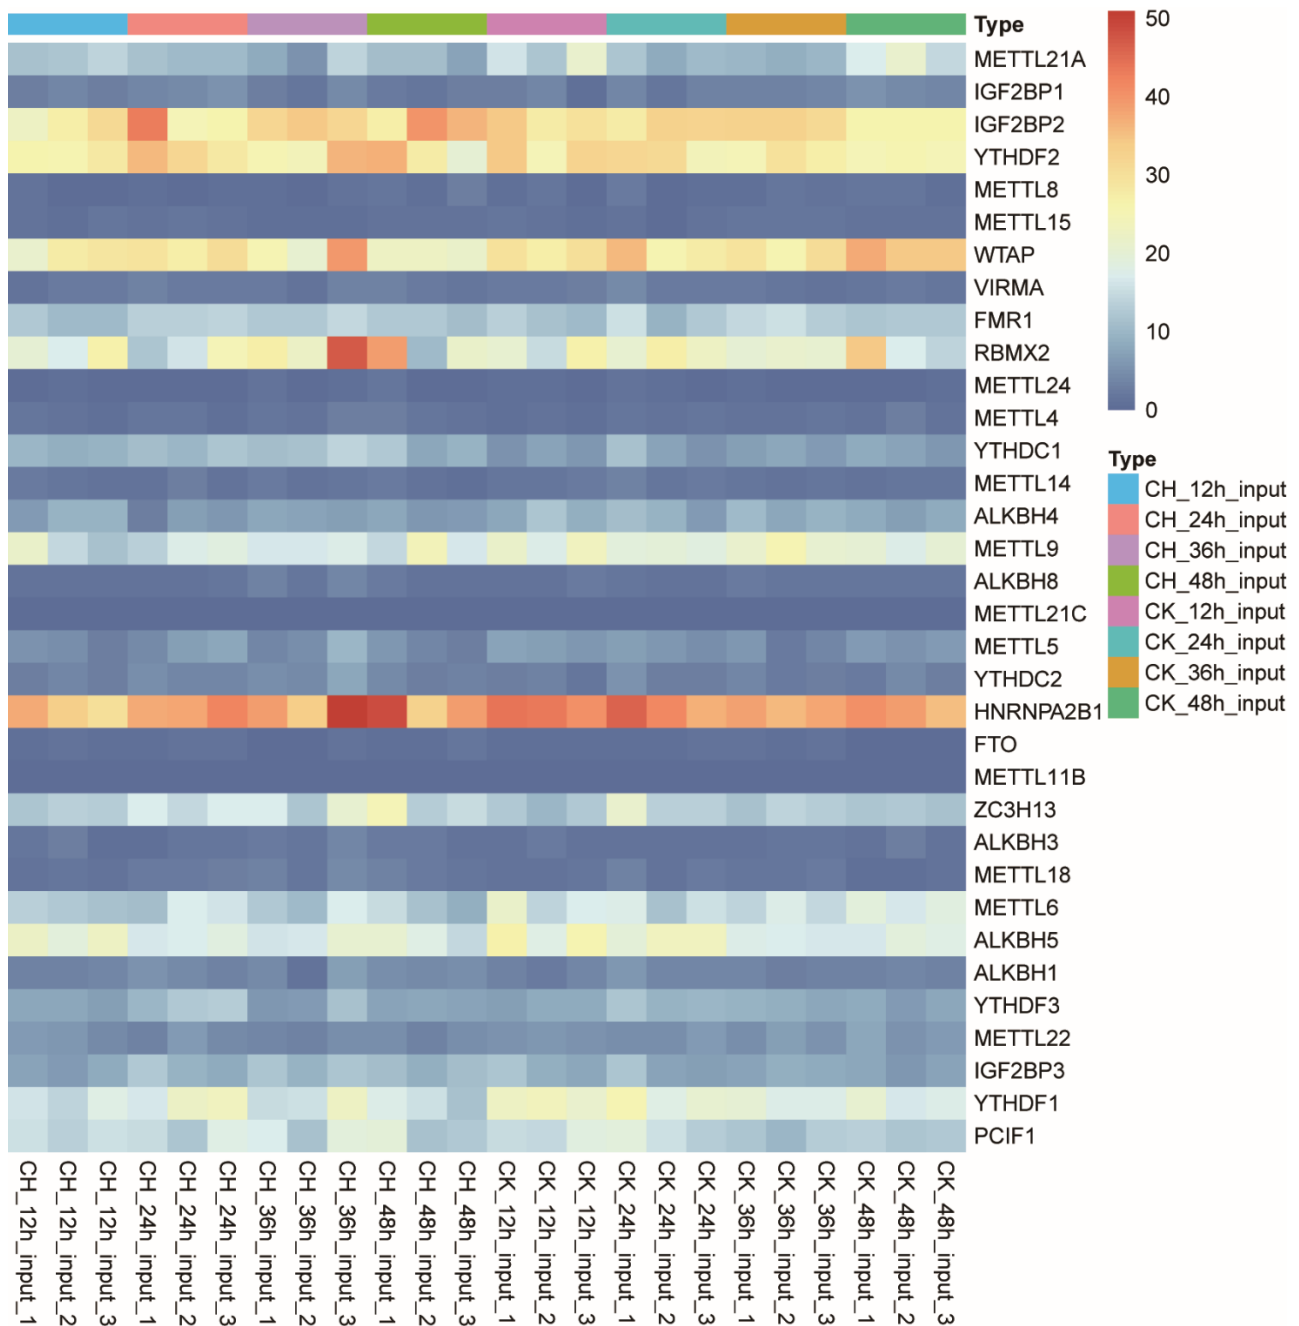

**Supplementary Figure 4.** The expression of potential m6A writers, erasers and readers in m6A-seq input samples, which were polyadenylated RNAs. Normalized FPKM values of each gene were presented.

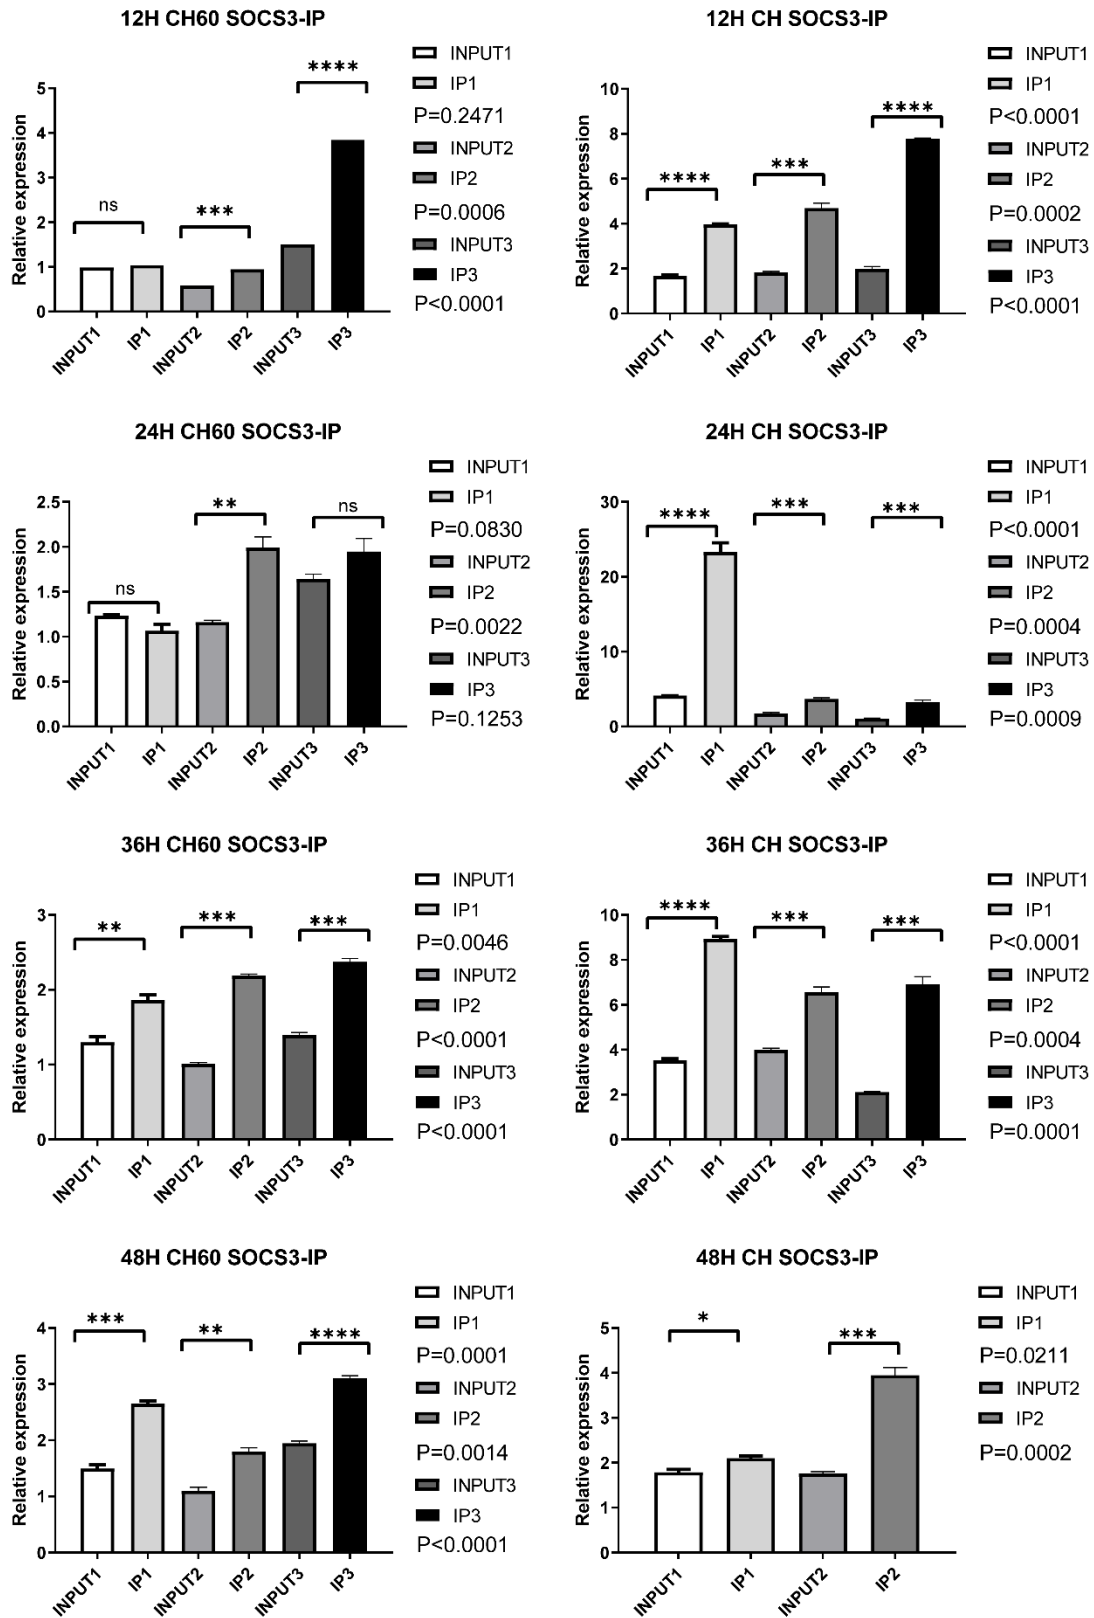

**Supplementary Figure 5.** Validation of m6A modified SOCS3 transcript by qRT-PCR method. Total input mRNA and m6A antibody immunoprecipitated mRNA were quantified and normalized by a

reference gene. SOCS3, suppressor of cytokine signaling 3.

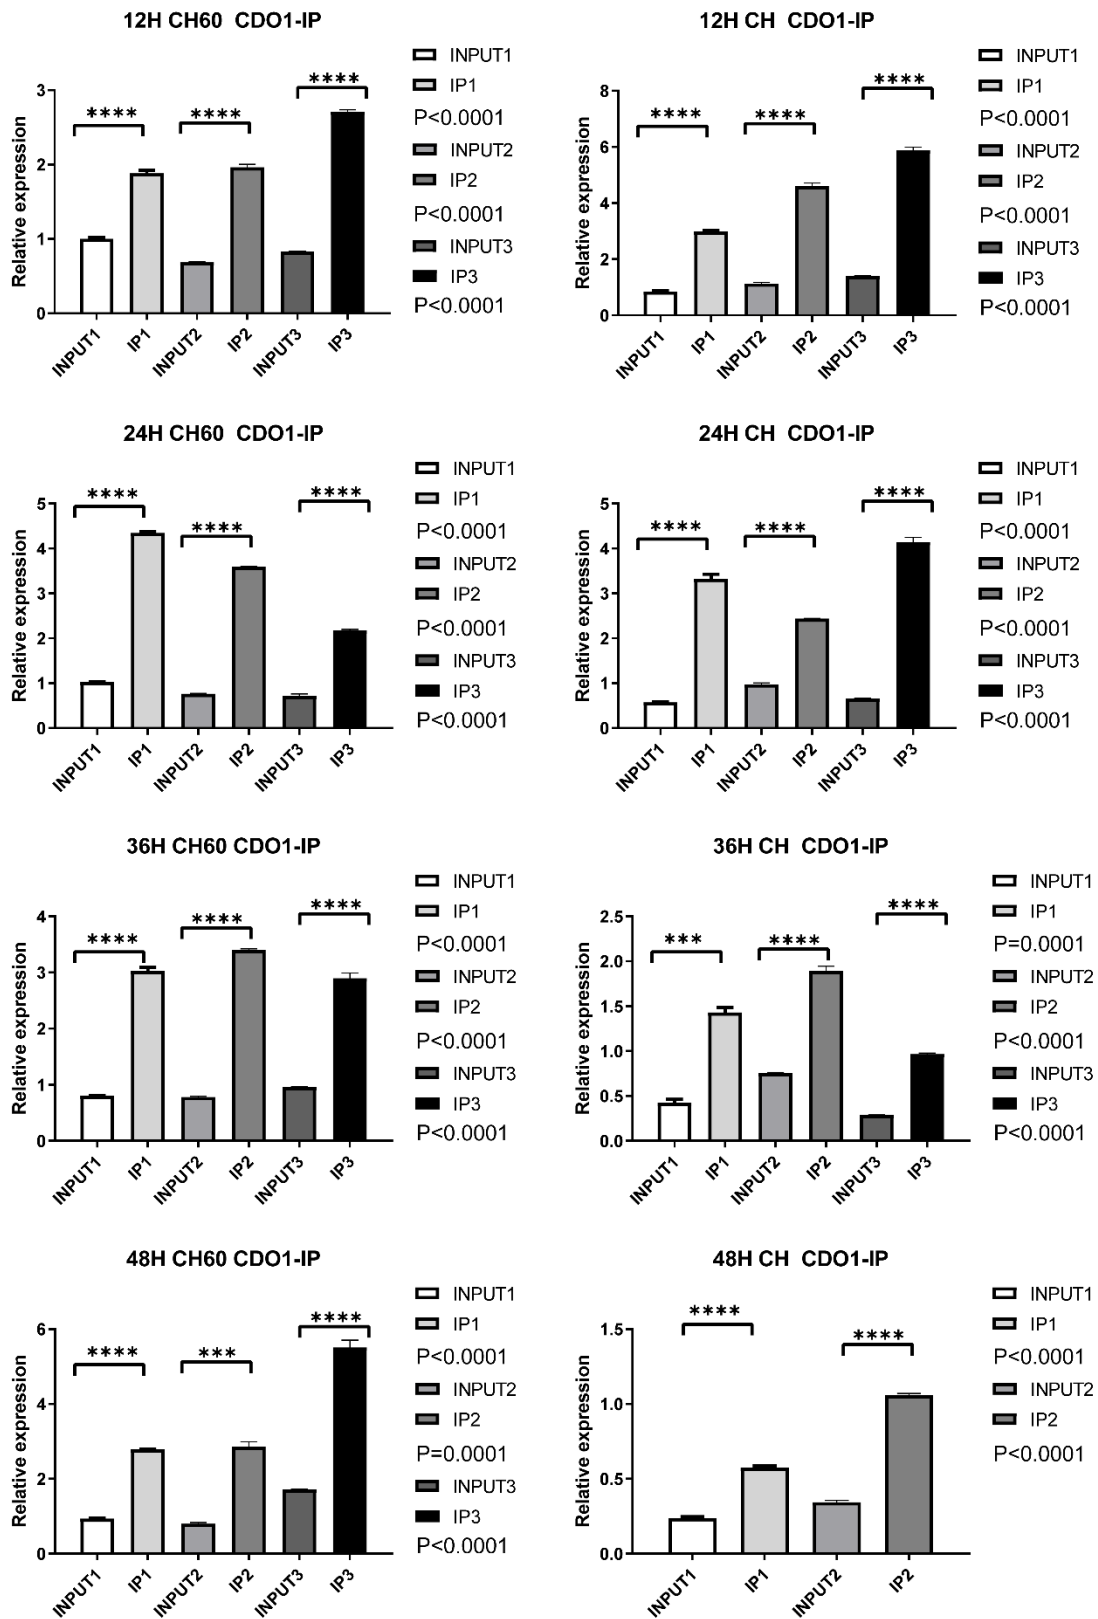

---

**Supplementary Figure 6.** Validation of m6A modified CDO1 transcript by qRT-PCR method. Total input mRNA and m6A antibody immunoprecipitated mRNA were quantified and normalized by a reference gene. CDO1, cysteine Dioxygenase Type 1.



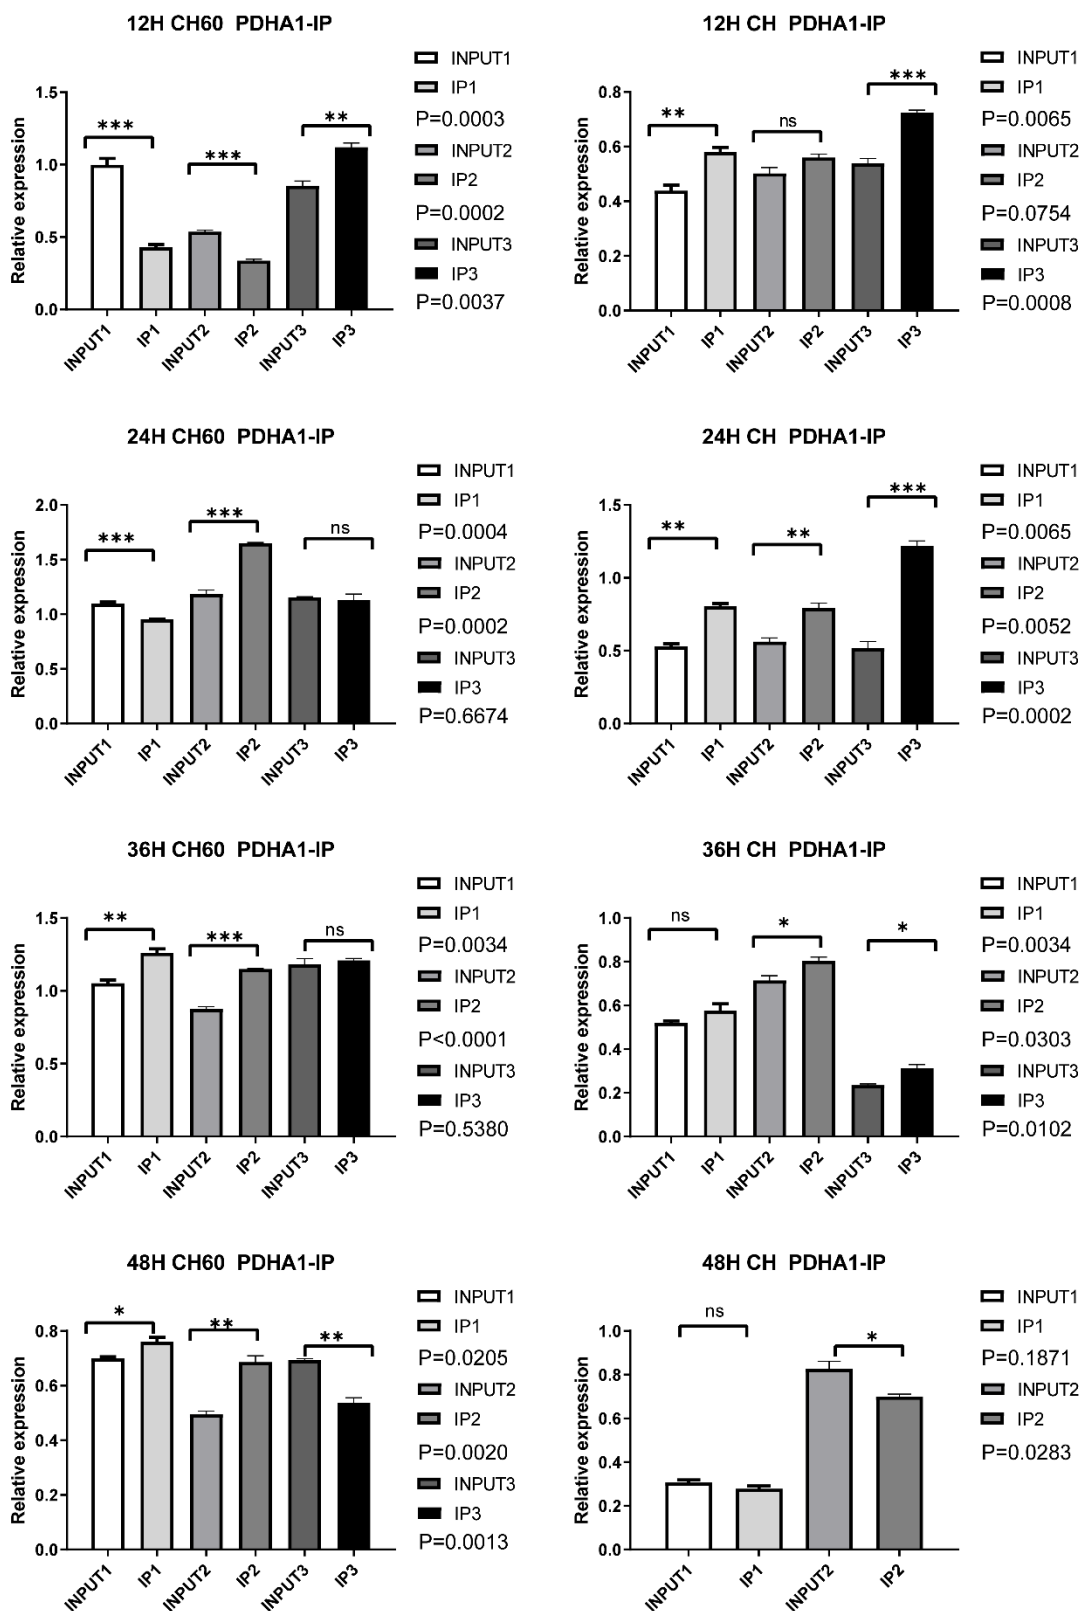

**Supplementary Figure 7.** Validation of m6A modified PDHA1 transcript by qRT-PCR method. Total input mRNA and m6A antibody immunoprecipitated mRNA were quantified and normalized by a reference gene. PDHA1, Pyruvate Dehydrogenase E1 Subunit Alpha 1.



**Supplementary Table 1. MeRIP-seq generated in this study**

| SampleID       | raw_total | clean_total | raw_base | clean_base | Total mapped     | Total Uniquely mapped |
|----------------|-----------|-------------|----------|------------|------------------|-----------------------|
| CH_12h_input_1 | 42692564  | 41118569    | 6.404G   | 5.187G     | 37052951(90.11%) | 32667121(88.16%)      |
| CH_12h_input_2 | 42069670  | 40545969    | 6.310G   | 5.084G     | 36545046(90.13%) | 32162745(88.01%)      |
| CH_12h_input_3 | 48319958  | 46591549    | 7.248G   | 5.802G     | 42022305(90.19%) | 37224440(88.58%)      |
| CH_12h_IP_1    | 41874488  | 40164264    | 6.281G   | 4.756G     | 36096344(89.87%) | 31396870(86.98%)      |
| CH_12h_IP_2    | 41378606  | 39331703    | 6.207G   | 4.679G     | 35328291(89.82%) | 30729223(86.98%)      |
| CH_12h_IP_3    | 45315548  | 43150417    | 6.797G   | 5.117G     | 38916668(90.19%) | 34133851(87.71%)      |
| CH_24h_input_1 | 47480258  | 46035282    | 7.122G   | 5.804G     | 41548736(90.25%) | 36900382(88.81%)      |
| CH_24h_input_2 | 46858488  | 44814323    | 7.029G   | 5.669G     | 40243966(89.8%)  | 35640639(88.56%)      |
| CH_24h_input_3 | 47211060  | 45218568    | 7.082G   | 5.578G     | 40625667(89.84%) | 35956910(88.51%)      |
| CH_24h_IP_1    | 39229248  | 37778036    | 5.884G   | 4.203G     | 33826264(89.54%) | 29184722(86.28%)      |
| CH_24h_IP_2    | 42811614  | 37925232    | 6.422G   | 4.491G     | 34218973(90.23%) | 29791585(87.06%)      |
| CH_24h_IP_3    | 46863354  | 44565651    | 7.030G   | 5.225G     | 39945284(89.63%) | 34769994(87.04%)      |
| CH_36h_input_1 | 43029222  | 41346125    | 6.454G   | 5.022G     | 37421408(90.51%) | 32656608(87.27%)      |
| CH_36h_input_2 | 44022958  | 42624397    | 6.603G   | 5.419G     | 38149185(89.5%)  | 33564616(87.98%)      |
| CH_36h_input_3 | 56409346  | 54507214    | 8.461G   | 6.631G     | 49256943(90.37%) | 43180175(87.66%)      |
| CH_36h_IP_1    | 38163028  | 36394418    | 5.724G   | 4.039G     | 32709030(89.87%) | 28147083(86.05%)      |
| CH_36h_IP_2    | 41399530  | 36501866    | 6.210G   | 4.107G     | 33126239(90.75%) | 28078027(84.76%)      |
| CH_36h_IP_3    | 49107818  | 47187858    | 7.366G   | 5.232G     | 42013803(89.04%) | 35920567(85.5%)       |
| CH_48h_input_1 | 46389464  | 44894420    | 6.958G   | 5.604G     | 40561016(90.35%) | 35481159(87.48%)      |
| CH_48h_input_2 | 47391274  | 45855701    | 7.109G   | 5.760G     | 42161835(91.94%) | 36648783(86.92%)      |
| CH_48h_input_3 | 53266168  | 51575822    | 7.990G   | 6.398G     | 47437961(91.98%) | 41173414(86.79%)      |
| CH_48h_IP_1    | 50723960  | 48851020    | 7.609G   | 5.365G     | 44152651(90.38%) | 37582149(85.12%)      |
| CH_48h_IP_2    | 41296318  | 38655560    | 6.194G   | 4.310G     | 35438547(91.68%) | 29781726(84.04%)      |
| CH_48h_IP_3    | 29659000  | 811199      | 4.449G   | 0.085G     | 113868(14.04%)   | 98415(86.43%)         |
| CK_12h_input_1 | 53470988  | 51603766    | 8.021G   | 6.343G     | 47280740(91.62%) | 41523009(87.82%)      |
| CK_12h_input_2 | 47605116  | 45893590    | 7.141G   | 5.631G     | 41984421(91.48%) | 36999967(88.13%)      |
| CK_12h_input_3 | 47574940  | 45963167    | 7.136G   | 5.661G     | 41447333(90.18%) | 36557097(88.2%)       |
| CK_12h_IP_1    | 38894260  | 35960528    | 5.834G   | 4.245G     | 32436543(90.2%)  | 28238548(87.06%)      |
| CK_12h_IP_2    | 38980936  | 36877408    | 5.847G   | 4.281G     | 33201772(90.03%) | 28966925(87.25%)      |
| CK_12h_IP_3    | 48893670  | 46665619    | 7.334G   | 5.367G     | 42060422(90.13%) | 36393733(86.53%)      |
| CK_24h_input_1 | 44740396  | 43131140    | 6.711G   | 5.432G     | 38828971(90.03%) | 34799337(89.62%)      |
| CK_24h_input_2 | 43498874  | 41952147    | 6.525G   | 5.176G     | 37918913(90.39%) | 33586406(88.57%)      |
| CK_24h_input_3 | 32622258  | 31612985    | 4.893G   | 3.950G     | 28602338(90.48%) | 25446667(88.97%)      |
| CK_24h_IP_1    | 42034550  | 39402469    | 6.305G   | 4.688G     | 35231081(89.41%) | 31313002(88.88%)      |
| CK_24h_IP_2    | 39932650  | 36833385    | 5.990G   | 4.312G     | 32829736(89.13%) | 28596332(87.1%)       |
| CK_24h_IP_3    | 42499602  | 40823906    | 6.375G   | 4.374G     | 37037695(90.73%) | 31713887(85.63%)      |
| CK_36h_input_1 | 49424832  | 47330121    | 7.414G   | 5.930G     | 42635260(90.08%) | 37473241(87.89%)      |
| CK_36h_input_2 | 49734466  | 47626475    | 7.460G   | 5.894G     | 43065107(90.42%) | 37936551(88.09%)      |
| CK_36h_input_3 | 41202626  | 39532459    | 6.180G   | 4.885G     | 36006716(91.08%) | 31480279(87.43%)      |
| CK_36h_IP_1    | 47746594  | 45041555    | 7.162G   | 5.112G     | 40444422(89.79%) | 34270543(84.73%)      |
| CK_36h_IP_2    | 44097722  | 41612002    | 6.615G   | 4.768G     | 37264465(89.55%) | 31909002(85.63%)      |
| CK_36h_IP_3    | 40656834  | 37590538    | 6.099G   | 4.280G     | 33579098(89.33%) | 28408603(84.6%)       |
| CK_48h_input_1 | 49401410  | 47851464    | 7.410G   | 6.034G     | 43540362(90.99%) | 38335103(88.04%)      |
| CK_48h_input_2 | 44818846  | 43419446    | 6.723G   | 5.488G     | 39417871(90.78%) | 34698249(88.03%)      |
| CK_48h_input_3 | 46503788  | 45007565    | 6.976G   | 5.697G     | 40953035(90.99%) | 36206729(88.41%)      |
| CK_48h_IP_1    | 38120642  | 36321281    | 5.718G   | 4.234G     | 33083598(91.09%) | 28265253(85.44%)      |

---

|             |          |          |        |        |                  |                  |
|-------------|----------|----------|--------|--------|------------------|------------------|
| CK_48h_IP_2 | 46005930 | 43483885 | 6.901G | 4.786G | 39676373(91.24%) | 33401719(84.19%) |
| CK_48h_IP_3 | 43624058 | 41915479 | 6.544G | 4.740G | 37695105(89.93%) | 32451788(86.09%) |

---

---

**Supplementary Table 2. Primers used in the validation of m6A targeting genes.**

---

| <b>Gene name</b> | <b>Primer (5'-3')</b>    |
|------------------|--------------------------|
| SOCS3-F          | CCCAACACGACGGGCACGAG     |
| SOCS3-R          | AGCACAAGAGCAGGGGACAGG    |
| PDHA1-F          | GGCTTGAAGGAGACTCGAGGACGG |
| PDHA1-R          | CCAGCAGCATCTTGCGCATGG    |
| CDO1-F           | CAGACGGAGATGTGGAAG       |
| CDO1-R           | GTTGCTCTCGTAGGACTC       |
| Reference-F      | AATTAACCCCTCACTAAAGGG    |
| Reference-R      | GTCCTTATCATCGTCGTCTT     |

---
